# Supplementary material
Source: PubMed Central journal article supplement (PMC3000267)
Supplement: 1010906107_pnas.201010906SI.pdf [file 1010906107_pnas.201010906SI.pdf]

# Supporting Information

Smith et al. 10.1073/pnas.1010906107

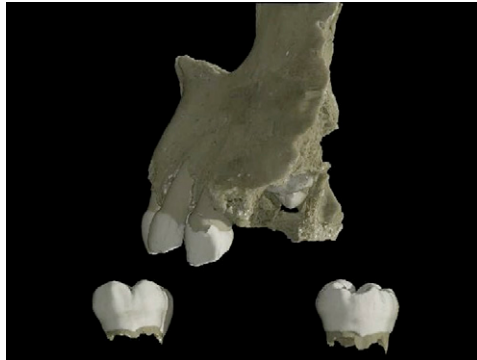

**Movie S1.** Multiscale synchrotron virtual histology illustrating age-at-death determination of the Engis 2 Neanderthal. First scale: voxel sizes of 31.3  $\mu\text{m}$  in absorption mode for virtual extraction of the full permanent dentition. Second scale: 4.95  $\mu\text{m}$  with phase-contrast effect for the isolated maxillary M1 (used for long-period line counts and observations of the neonatal line). Third scale: 0.678  $\mu\text{m}$  with phase contrast for the small cube of enamel used to determine the long-period line periodicity.

[Movie S1](#)

## Other Supporting Information Files

[SI Appendix \(PDF\)](#)
